# Supplementary material for: Sulfur-doped cobalt molybdenum oxide with a hydrangea-like structure for bi-functionally efficient overall water splitting
Source: Royal Society of Chemistry journal article supplement (doi:10.1039/d3ta07380g), 2024-01-01
Supplement: d3ta07380g1.pdf [file d3ta07380g1.pdf]

## Supplementary Information

### **Sulfur-doped cobalt molybdenum oxide with hydrangea-like structure for bi-functionally efficient overall water splitting**

Jie Dong,<sup>a</sup> Saiyi Chen,<sup>a</sup> Cuncai Lv,<sup>b</sup> Mark G Humphrey,<sup>c</sup> Chi Zhang<sup>a,\*</sup> and Zhipeng Huang<sup>a,\*</sup>

<sup>a</sup> China-Australia Joint Research Center for Functional Molecular Materials, School of Chemical Science and Engineering, Tongji University, Shanghai, 200092, China. Email: chizhang@tongji.edu.cn, zphuang@tongji.edu.cn

<sup>b</sup> Key Laboratory of High-precision Computation and Application of Quantum Field Theory of Hebei Province, Hebei Key Lab of Optic-electronic Information and Materials, The College of Physics Science and Technology, Hebei University, Baoding 071002, China

<sup>c</sup> Research School of Chemistry, Australian National University, Canberra, ACT, 2601, Australia

**The specific steps of HER are as follows:**

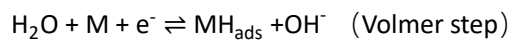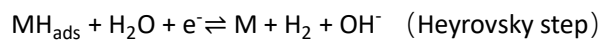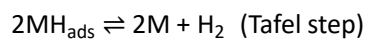

where M is the catalyst active site, and ads are chemisorption.

**The specific steps of OER are as follows:**

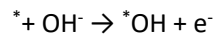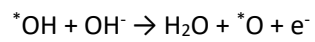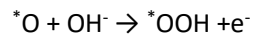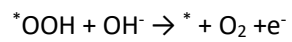

where \* is the catalyst's active site.

### Kinetic analysis based on the dual-pathway kinetic model: <sup>1,2</sup>

Based on the Tafel-Heyrovsky-Volmer mechanism, there are three elementary reaction steps for the HOR-HER (with + and – for the reactions in the HOR and HER direction) on the catalysts' surfaces.

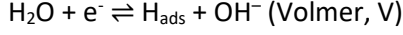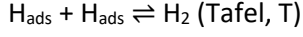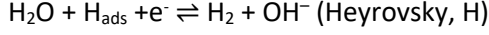

For the HER process, the total kinetic currents ( $J_k$ ) can be expressed as:

$$J_k = J_T + J_H = J_V - J_T$$

Where the kinetic currents for  $J_T$ ,  $J_V$ , and  $J_H$  are:

$$J_T = J_{+T} - J_{-T} = J^* e^{-\Delta G_{+T}^*/kT} [(1 - \theta)^2 - e^{2\Delta G_{ad}^0/kT} \theta^2]$$

$$J_V = J_{+V} - J_{-V} = J^* e^{-\Delta G_{-V}^*/kT} [e^{(\Delta G_{ad}^0 + 0.5\eta)/kT} \theta - e^{-0.5\eta/kT} (1 - \theta)]$$

$$J_H = J_{+H} - J_{-H} = J^* e^{-\Delta G_{+H}^*/kT} [e^{0.5\eta/kT} (1 - \theta) - e^{\Delta G_{ad}^0 - 0.5\eta/kT} \theta]$$

where the fixed reference prefactor  $j^*$  is  $1000 \text{ A cm}^{-2}$

The four variable kinetic parameters are the standard (at zero overpotential) free energies of adsorption for the reaction intermediate,  $\text{H}_{\text{ad}}$  ( $\Delta G_{ad}^0$ ), and  $\Delta G_{+T}^*$  for Tafel step,  $\Delta G_{-V}^*$  for Volmer step,  $\Delta G_{+H}^*$  for Heyrovsky step. The adsorption isotherm,  $\theta$ , can be expressed as:

$$\theta = \frac{-B - \sqrt{B^2 - 4AC}}{2A}$$

In which

$$A = 2g_{+T} - 2g_{-T}$$

$$B = -4g_{+T} - g_{+H} - g_{-H} - g_{+V} - g_{-V}$$

$$C = 2g_{+T} + g_{+H} + g_{-V}$$

The expressions for  $g_i$  are given below:

$$g_{+T} = \exp(-\Delta G_{+T}^*/kT)$$

$$g_{-T} = \exp[-(\Delta G_{+T}^* - 2\Delta G_{ad}^0)/kT]$$

$$g_{+V} = \exp[-(\Delta G_{-V}^* - \Delta G_{ad}^0 - 0.5\eta)/kT]$$

$$g_{-V} = \exp[-(\Delta G_{-V}^* + 0.5\eta)/kT]$$

$$g_{+H} = \exp[-(\Delta G_{+H}^* - 0.5\eta)/kT]$$

$$g_{-H} = \exp[-(\Delta G_{+H}^* - \Delta G_{ad}^0 + 0.5\eta)/kT]$$

where  $kT = 25.51 \text{ meV}$  at  $296.15 \text{ K}$

## Content

**Fig. S1** SEM images of (a) CoMoO, (b) S-CoMoO-3.1, (c) S-CoMoO-6.2, (d) S-CoMoO-9.3, (e) S-CoMoO-15.5 and (f) S-CoMoO-18.6 samples.

**Fig. S2** N<sub>2</sub> sorption isotherms of (a) CoMoO, (b) S-CoMoO-3.1, (c) S-CoMoO-6.2, (d) S-CoMoO-9.3, (e) S-CoMoO-15.5 and (f) S-CoMoO-18.6 samples.

**Fig. S3** (a) N<sub>2</sub> sorption isotherms of S-CoMoO-12.4; (b) EDS spectrum and elemental analysis data of S-CoMoO-12.4.

**Fig. S4** EDS spectra and elemental analysis datas of (a) CoMoO, (b) S-CoMoO-3.1, (c) S-CoMoO-6.2, (d) S-CoMoO-9.3, (e) S-CoMoO-15.5 and (f) S-CoMoO-18.6 samples.

**Fig. S5** XPS survey spectra of CoMoO and S-CoMoO-12.4

**Fig. S6** The calculated TOF (HER) curves of CoMoO and S-CoMoO-12.4.

**Fig. S7** SEM images of S-CoMoO-12.4 after the long-term HER testing.

**Fig. S8** The high-resolution spectra of (a) Co 2p, (b) Mo 3d, (c) S 2p and (d) O 1s of S-CoMoO-12.4 before and after the long-term HER testing.

**Fig. S9** The survey XPS spectra of S-CoMoO-12.4 after HER/OER and after long-term HER/OER testing.

**Fig. S10** The equivalent circuit model for electrochemical impedance tests.

**Fig. S11** CV curves measured at different scan rates from 10 to 50 mV s<sup>-1</sup> in the region of 0.281 - 0.381 V in 1.0 M KOH for (a) CoMoO and (b) S-CoMoO-12.4; (c) CV current density versus sweep rate of different samples (the slope is equal to the C<sub>dl</sub>)

**Fig. S12** Tafel curves (OER) of CoMoO, S-CoMoO-3.1, S-CoMoO-6.2, S-CoMoO-9.3, S-CoMoO-12.4, S-CoMoO-15.5, S-CoMoO-18.6, and RuO<sub>2</sub>.

**Fig. S13** The polarization curves (OER) for current density normalized to ECSA for CoMoO and S-CoMoO-12.4.

**Fig. S14** The (a) mass activity and (b) turnover frequency of CoMoO and S-CoMoO-12.4.

**Fig. S15** CV curves measured at different scan rates from 10 to 50 mV s<sup>-1</sup> in the region of 0.928 – 1.028 V in 1.0 M KOH for (a) CoMoO and (b) S-CoMoO-12.4; (c) CV current density versus sweep rate of different samples (the slope is equal to the C<sub>dl</sub>)

**Fig. S16** The high-resolution spectra of (a) Co 2p, (b) Mo 3d, (c) S 2p and (d) O 1s of S-CoMoO-12.4 before and after the long-term OER testing.

**Fig. S17** SEM images of S-CoMoO-12.4 after the OER test

**Fig. S18** LSV curves of S-CoMoO-12.4 | S-CoMoO-12.4 e before and after the 1000 LSVs test.

**Fig. S19** The high-resolution spectra of (a) Co 2p, (b) Mo 3d, (c) S 2p and (d) O 1s of S-CoMoO-12.4 before and after the HER.

**Fig. S20** The high-resolution spectra of (a) Co 2p, (b) Mo 3d and (c) O 1s of CoMoO before and after the HER; (d) survey spectrum of CoMoO after the HER.

**Fig. S21** The high-resolution spectra of (a) Co 2p, (b) Mo 3d, (c) S 2p and (d) O 1s of S-CoMoO-12.4 before and after the OER.

**Fig. S22** The high-resolution spectra of (a) Co 2p, (b) Mo 3d and (c) O 1s of CoMoO before and after the HER; (d) survey spectrum of CoMoO after the OER.

**Table S1** EDS analysis of the samples.

**Table S2** Parameters obtained from fitting the EIS spectra at HER.

**Table S3** Parameters obtained from fitting the EIS spectra at OER.

**Table S4** Summary of recently reported non-noble metal based oxides electrocatalysts in alkaline

conditions.

**Table S5** XPS peak positions and percent peak areas of fitted high-resolution spectra of Co 2p, Mo 3d, O 1s and S 2p for CoMoO and S-CoMoO-12.4.

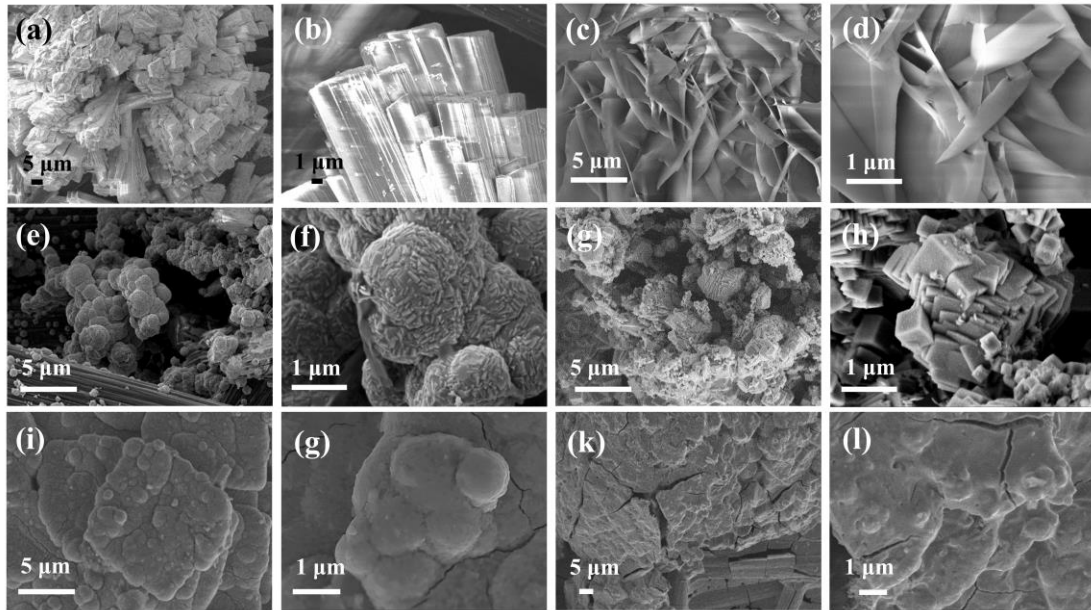

**Fig. S1** SEM images of (a, b) CoMoO, (c, d) S-CoMoO-3.1, (e, f) S-CoMoO-6.2, (g, h) S-CoMoO-9.3, (i, j) S-CoMoO-15.5 and (k, l) S-CoMoO-18.6 samples.

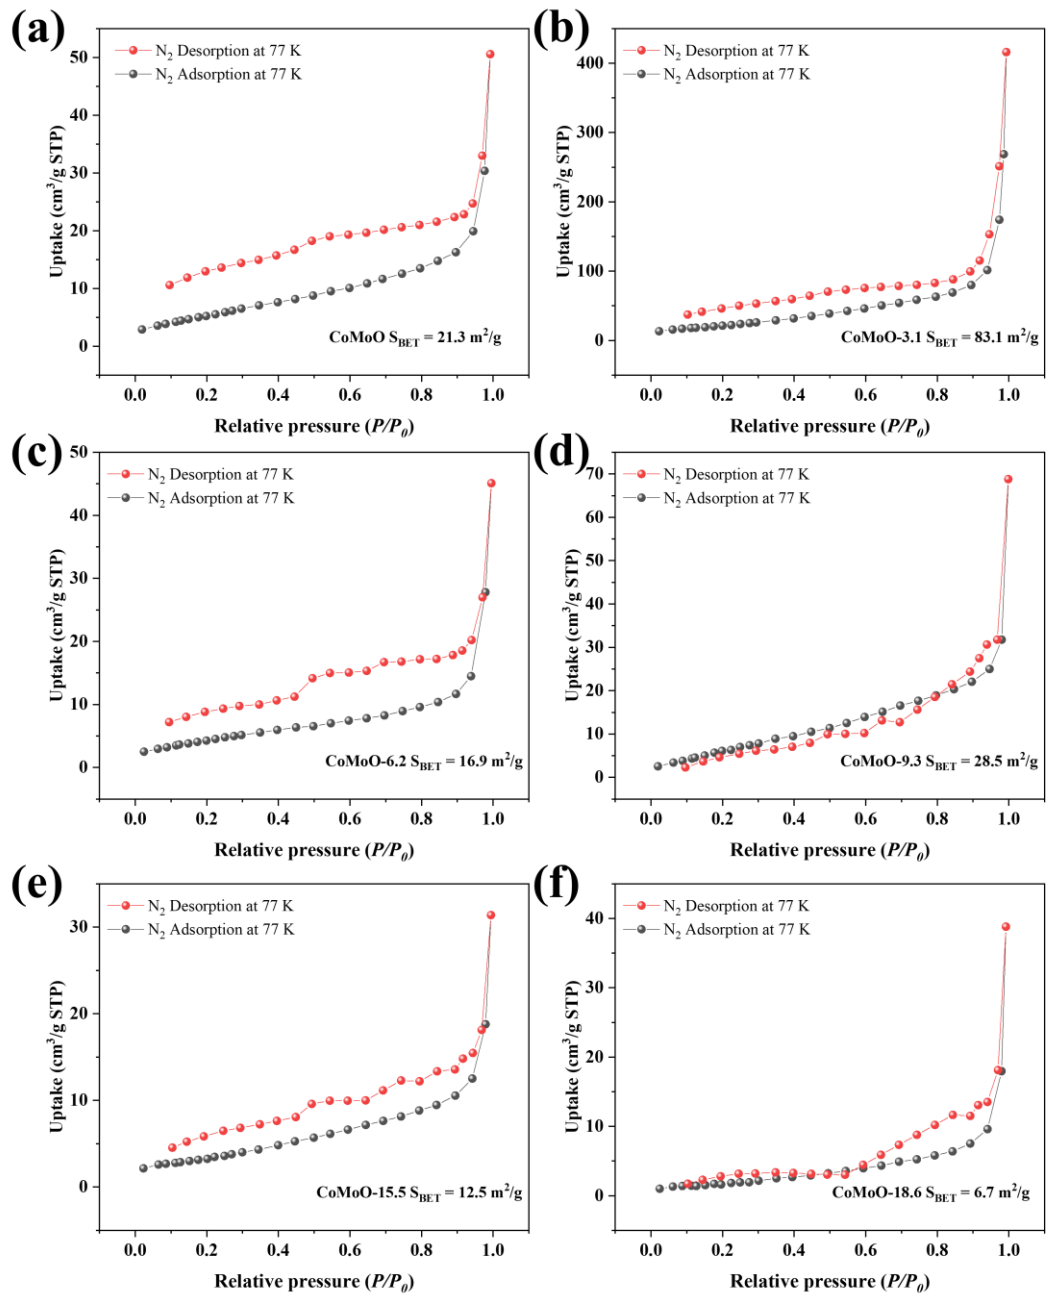

**Fig. S2** N<sub>2</sub> sorption isotherms of (a) CoMoO, (b) S-CoMoO-3.1, (c) S-CoMoO-6.2, (d) S-CoMoO-9.3, (e) S-CoMoO-15.5 and (f) S-CoMoO-18.6 samples.

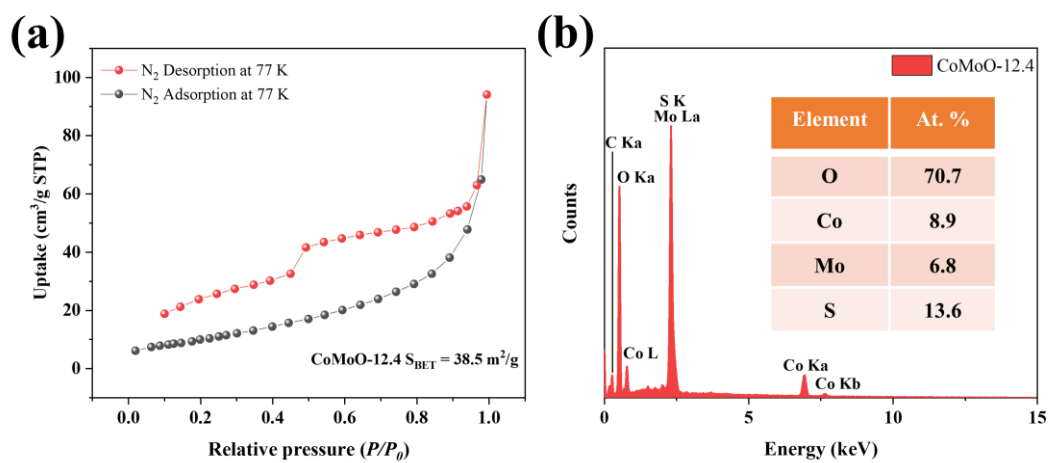

**Fig. S3** (a) N<sub>2</sub> sorption isotherms of S-CoMoO-12.4; (b) EDS spectrum and elemental analysis data of S-CoMoO-12.4.



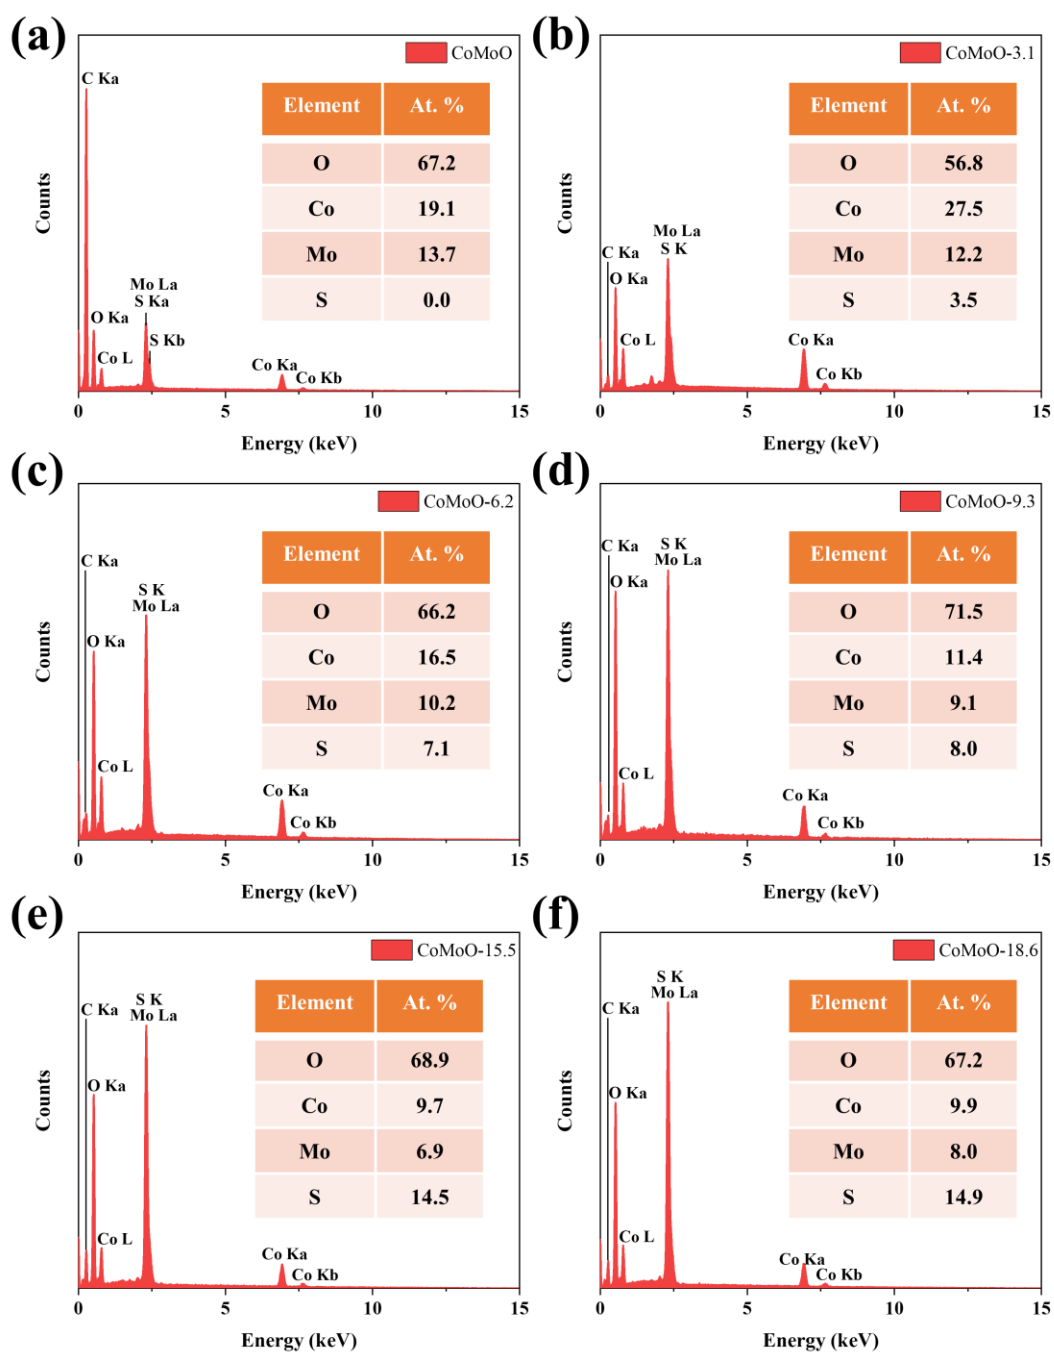

**Fig. S4** EDS spectra and elemental analysis datas of (a) CoMoO, (b) S-CoMoO-3.1, (c) S-CoMoO-6.2, (d) S-CoMoO-9.3, (e) S-CoMoO-15.5 and (f) S-CoMoO-18.6 samples.

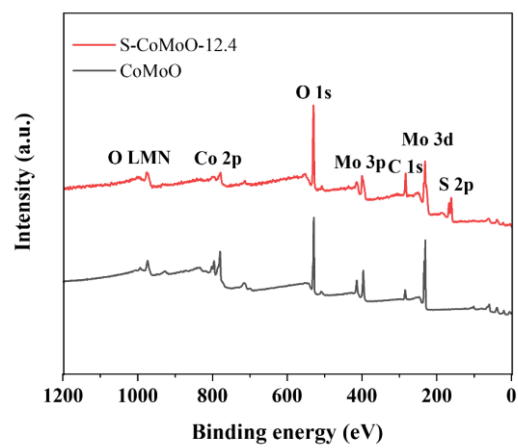

**Fig. S5** XPS survey spectra of CoMoO and S-CoMoO-12.4.

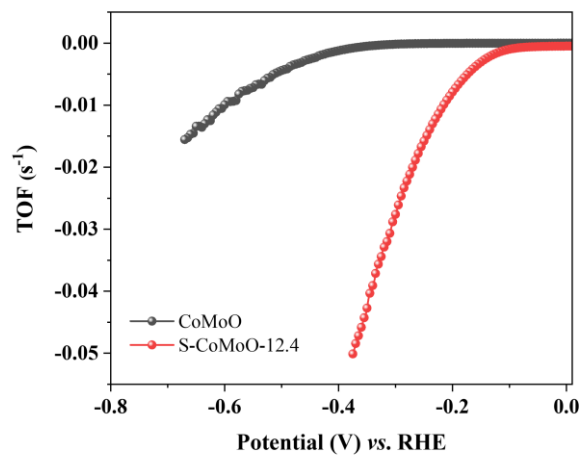

**Fig. S6** The calculated TOF (HER) curves of CoMoO and S-CoMoO-12.4.

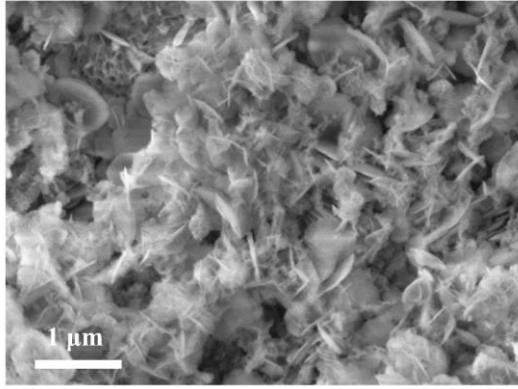

**Fig. S7** SEM images of S-CoMoO-12.4 after the long-term HER testing.

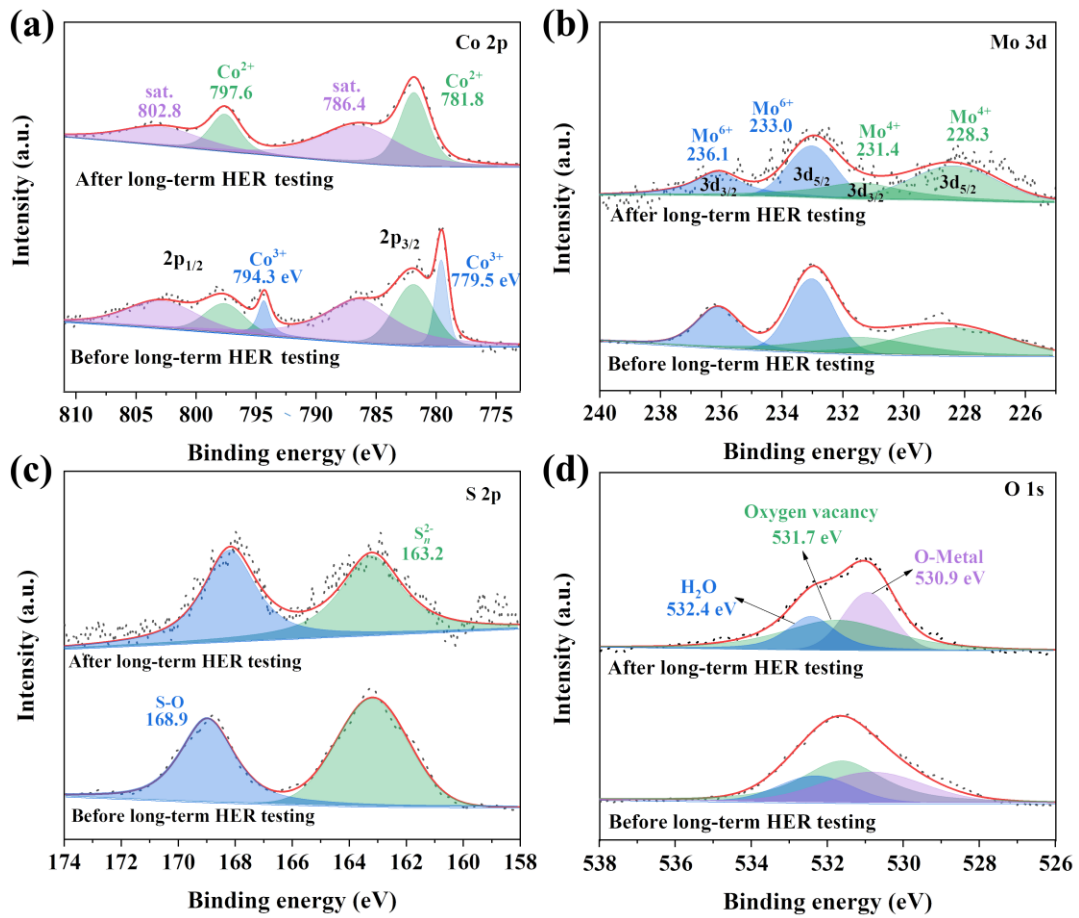

**Fig. S8** The high-resolution spectra of (a) Co 2p, (b) Mo 3d, (c) S 2p and (d) O 1s of S-CoMoO-12.4 before and after the long-term HER testing.

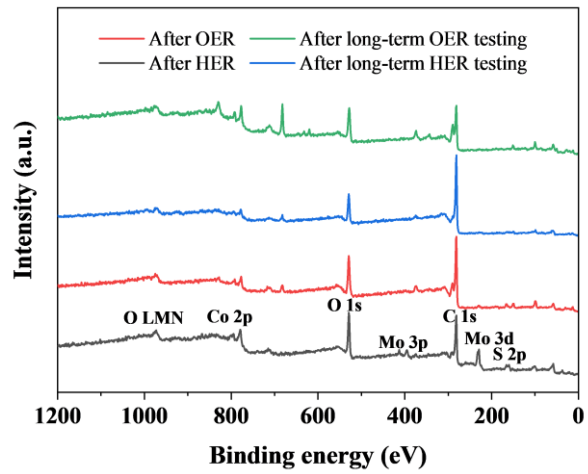

**Fig. S9** The survey XPS spectra of S-CoMoO-12.4 after HER/OER and after long-term HER/OER testing.

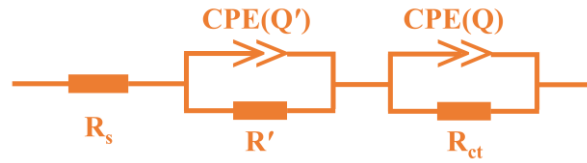

**Fig. S10** The equivalent circuit model for electrochemical impedance tests.  $R_s$ ,  $R'$ , and  $R_{ct}$  represent the resistances of the equivalent series resistance, electrode porosity, and charge transfer, respectively. The constant phase angle element (CPE) represents the double-layer capacitance of a solid electrode in a real-world situation. And the  $R_s$  is generally acknowledged to contain the electrode resistance, electrolyte resistance, electrode/electrolyte interface resistance and collector/electrode contact resistance.

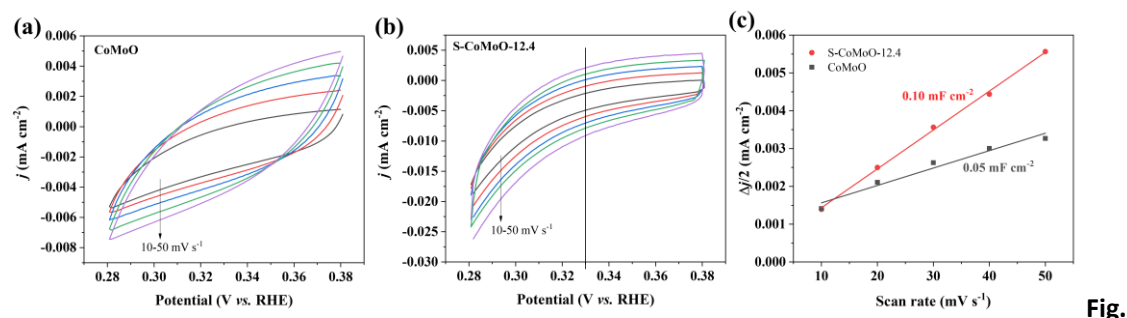

**Fig.**

**S11** CV curves measured at different scan rates from 10 to 50 mV s<sup>-1</sup> in the region of 0.281 - 0.381 V in 1.0 M KOH for (a) CoMoO and (b) S-CoMoO-12.4; (c) CV current density versus sweep rate of different samples (the slope is equal to the *C<sub>dl</sub>*)



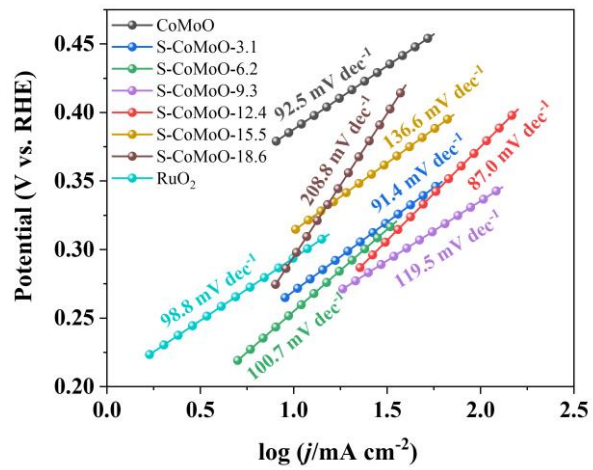

**Fig. S12** Tafel curves (OER) of CoMoO, S-CoMoO-3.1, S-CoMoO-6.2, S-CoMoO-9.3, S-CoMoO-12.4, S-CoMoO-15.5, S-CoMoO-18.6, and RuO<sub>2</sub>.

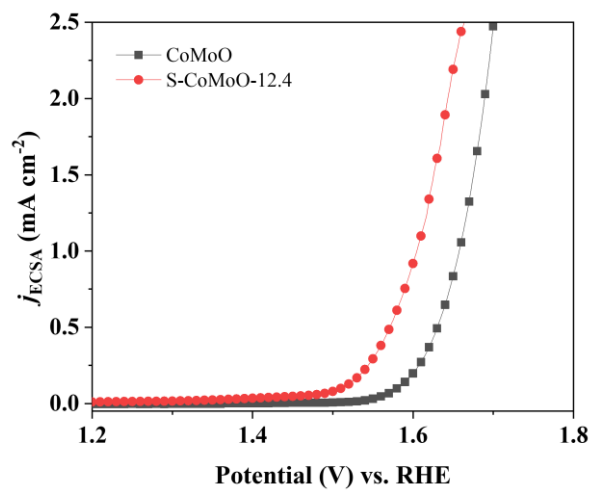

**Fig. S13** The polarization curves (OER) for current density normalized to ECSA for CoMoO and S-CoMoO-12.4.

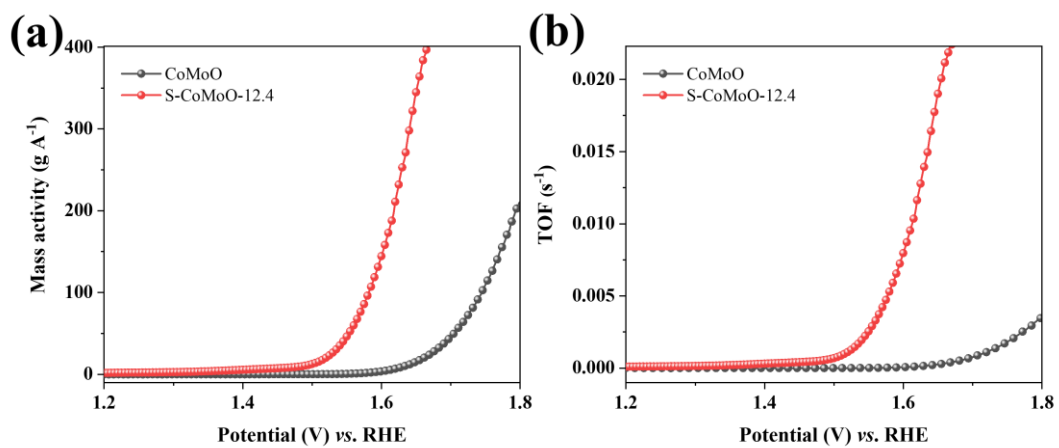

**Fig. S14** The (a) mass activity and (b) turnover frequency of CoMoO and S-CoMoO-12.4.

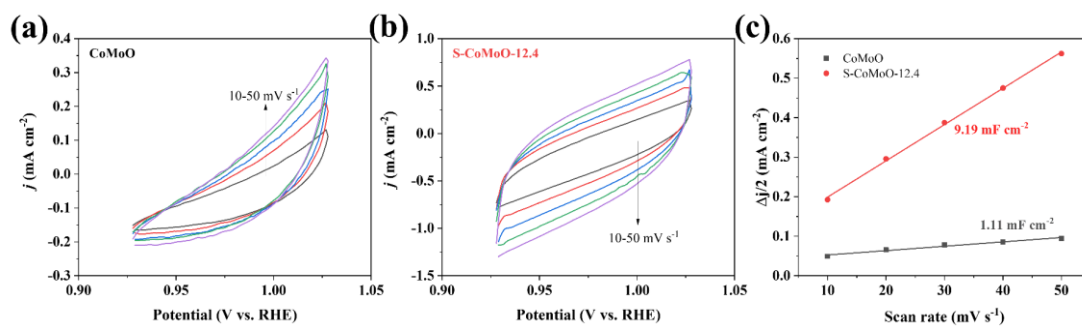

**Fig. S15** CV curves measured at different scan rates from 10 to 50 mV s<sup>-1</sup> in the region of 0.928 – 1.028 V in 1.0 M KOH for (a) CoMoO and (b) S-CoMoO-12.4; (c) CV current density versus sweep rate of different samples (the slope is equal to the  $C_{dl}$ )

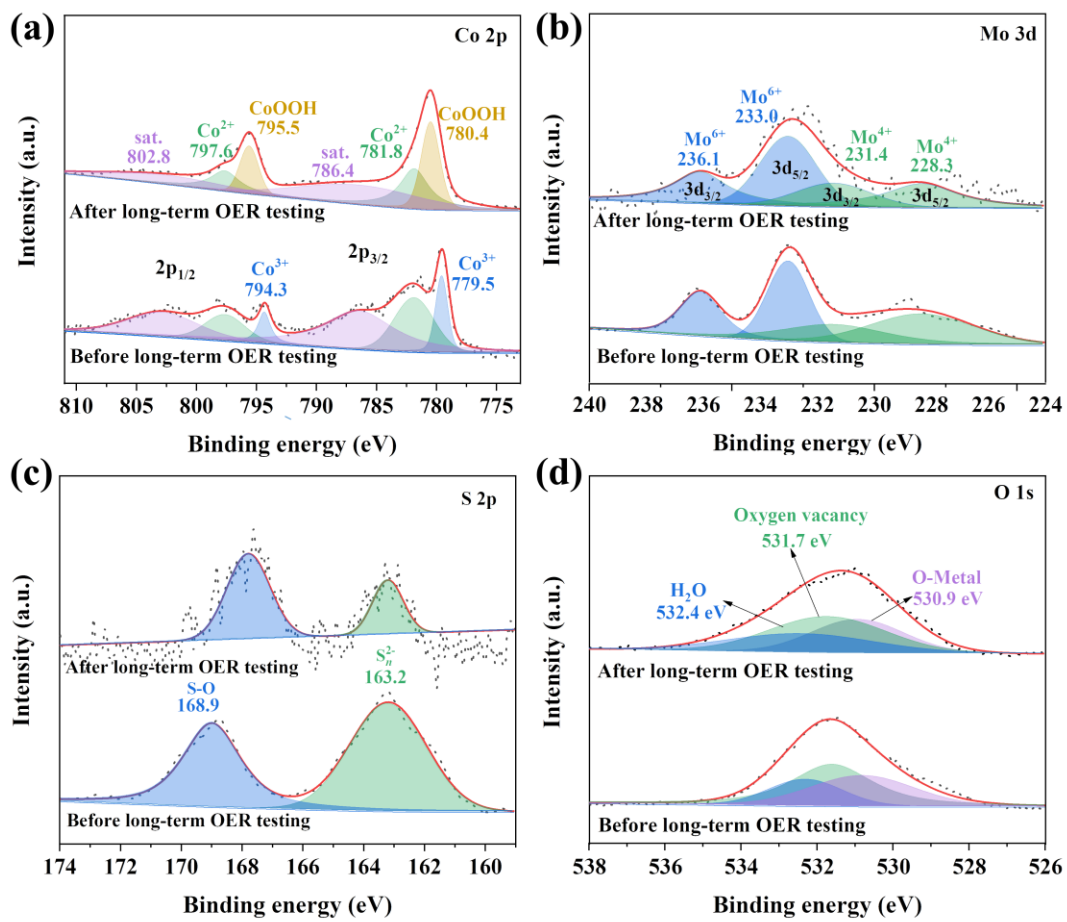

**Fig. S16** The high-resolution spectra of (a) Co 2p, (b) Mo 3d, (c) S 2p and (d) O 1s of S-CoMoO-12.4 before and after the long-term OER testing.

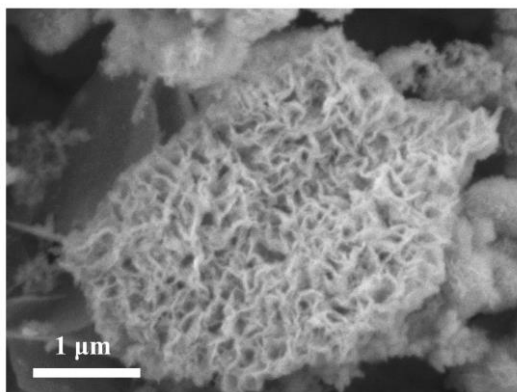

**Fig. S17** SEM images of S-CoMoO-12.4 after the OER test.

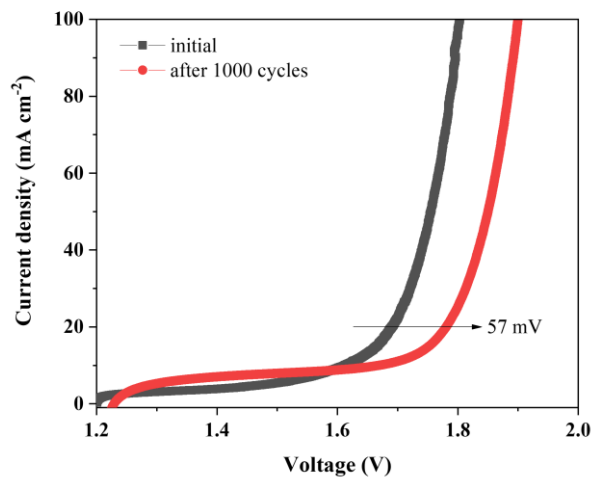

**Fig. S18.** LSV curves of S-CoMoO-12.4 || S-CoMoO-12.4 e before and after the 1000 LSVs test.

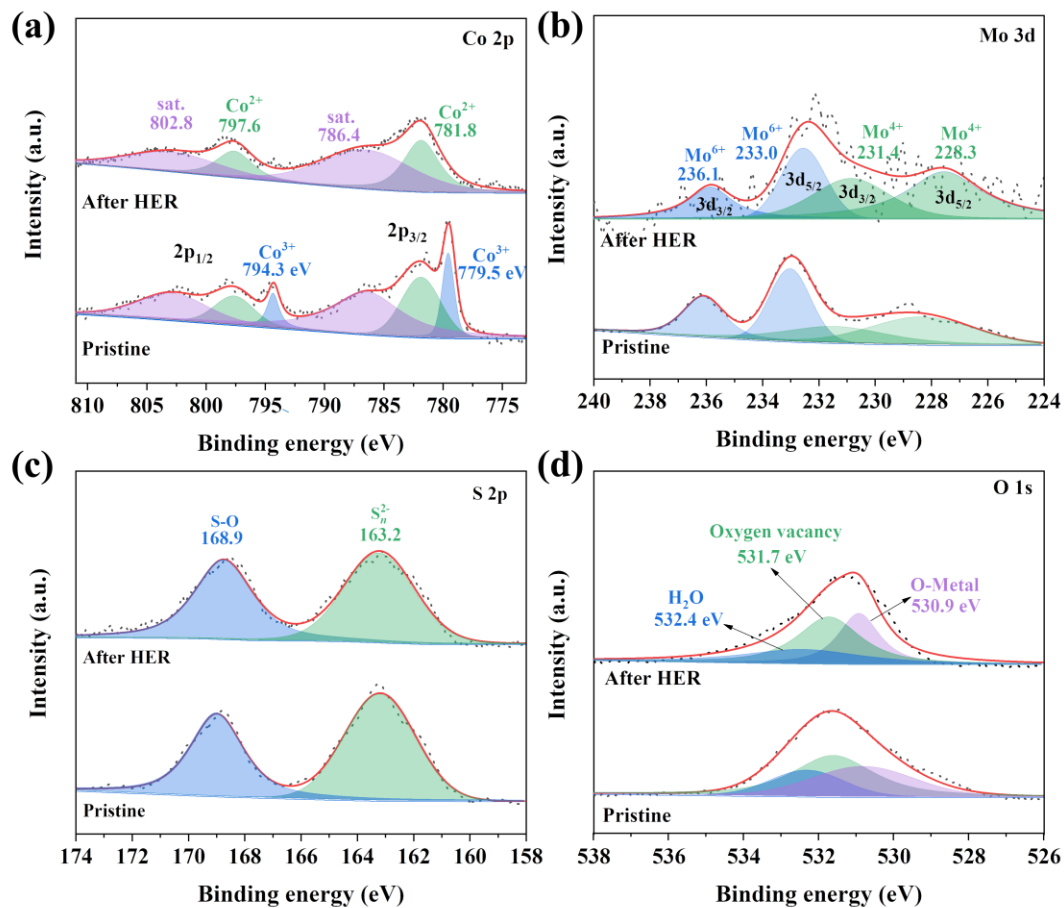

**Fig. S19** The high-resolution spectra of (a) Co 2p, (b) Mo 3d, (c) S 2p and (d) O 1s of S-CoMoO-12.4 before and after the HER.



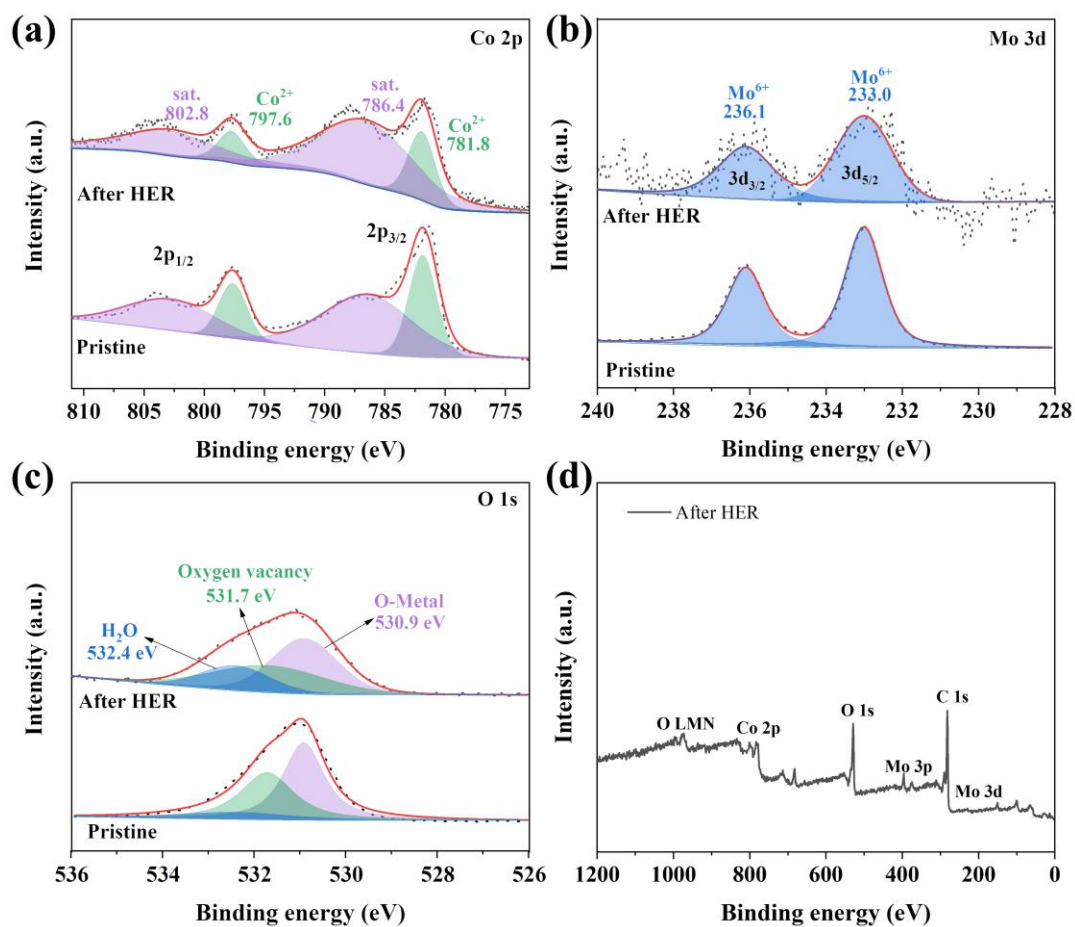

**Fig. S20** The high-resolution spectra of (a) Co 2p, (b) Mo 3d and (c) O 1s of CoMoO before and after the HER; (d) survey spectrum of CoMoO after the HER.

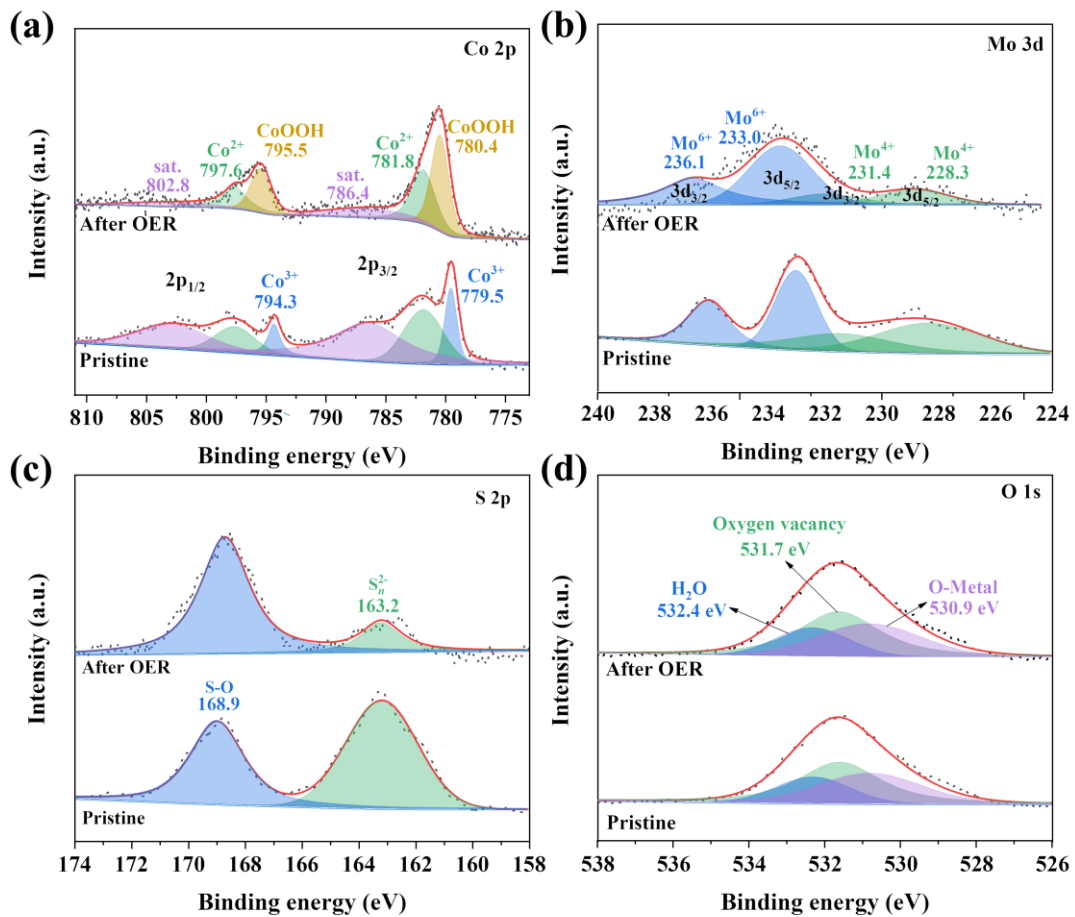

**Fig. S21** The high-resolution spectra of (a) Co 2p, (b) Mo 3d, (c) S 2p and (d) O 1s of S-CoMoO-12.4 before and after the OER.

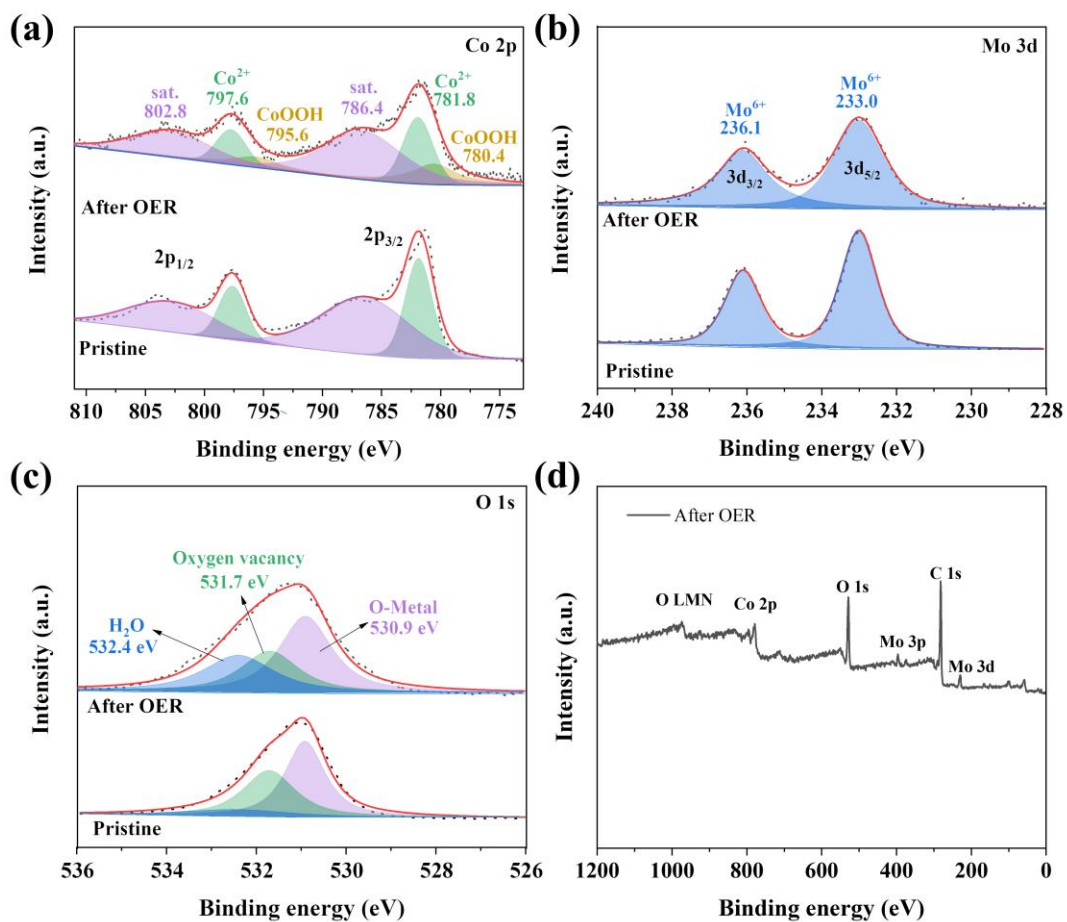

**Fig. S22** The high-resolution spectra of (a) Co 2p, (b) Mo 3d and (c) O 1s of CoMoO before and after the HER; (d) survey spectrum of CoMoO after the OER.

**Table S1** EDS analysis of the samples.

| Sample       | Element (atom %) |      |      |      |
|--------------|------------------|------|------|------|
|              | O                | Co   | Mo   | S    |
| CoMoO        | 67.2             | 19.1 | 13.7 | 0.0  |
| S-CoMoO-3.1  | 56.8             | 27.5 | 12.2 | 3.5  |
| S-CoMoO-6.2  | 66.2             | 16.5 | 10.2 | 7.1  |
| S-CoMoO-9.3  | 71.5             | 11.4 | 9.1  | 8.0  |
| S-CoMoO-12.4 | 70.7             | 8.9  | 6.8  | 13.6 |
| S-CoMoO-15.5 | 68.9             | 9.7  | 6.9  | 14.5 |
| S-CoMoO-18.6 | 67.2             | 9.9  | 8.0  | 14.9 |

**Table S2** Parameters obtained from fitting the EIS spectra at HER.

| Sample       | $R_s (\Omega)$ | CPE ( $Q'$ )            |      | $R'(\Omega)$ | CPE ( $Q$ )            |      | $R_{ct} (\Omega)$ |
|--------------|----------------|-------------------------|------|--------------|------------------------|------|-------------------|
|              |                | $Y_0' (S \cdot s^{-n})$ | $n'$ |              | $Y_0 (S \cdot s^{-n})$ | $n$  |                   |
| CoMoO        | 1.76           | 0.28                    | 0.55 | 0.21         | 0.07                   | 0.88 | 10.03             |
| S-CoMoO-12.4 | 1.38           | 2.13                    | 0.55 | 0.62         | 0.81                   | 0.97 | 2.66              |

Table S3 Parameters obtained from fitting the EIS spectra at OER.

| Sample       | $R_s (\Omega)$ | CPE ( $Q'$ )            |      | $R'(\Omega)$ | CPE ( $Q$ )            |      | $R_{ct} (\Omega)$ |
|--------------|----------------|-------------------------|------|--------------|------------------------|------|-------------------|
|              |                | $Y_0' (S \cdot s^{-n})$ | $n'$ |              | $Y_0 (S \cdot s^{-n})$ | $n$  |                   |
| CoMoO        | 1.62           | 4.60E-4                 | 1.00 | 0.22         | 4.79 E-4               | 0.88 | 108.80            |
| S-CoMoO-12.4 | 1.24           | 0.18                    | 0.48 | 0.47         | 0.38                   | 0.83 | 0.80              |

**Table S4** Summary of recently reported non-noble metal based oxides electrocatalysts in alkaline conditions.

| Catalyst                           | HER              | OER              | Cell voltage (V) at<br>10 mA cm <sup>-2</sup> | Substrate | Ref.             |
|------------------------------------|------------------|------------------|-----------------------------------------------|-----------|------------------|
|                                    | $\eta_{10}$ (mV) | $\eta_{10}$ (mV) |                                               |           |                  |
| S-CoMoO-12.4 <sup>a</sup>          | 105              | 205              | 1.61                                          | CFP       | <b>This work</b> |
| CoV/CF-CWs <sup>a</sup>            | 118              | 204 <sup>c</sup> | 1.48                                          | CF        | 3                |
| CoFeO@BP <sup>a</sup>              | 88               | 266              | 1.58                                          | GCE       | 4                |
| AC-SrIrO <sub>3</sub> <sup>b</sup> | 139              | 300              | 1.59                                          | GCE       | 5                |
| S-CoO <sub>x</sub> <sup>a</sup>    | 136              | 270              | 1.63                                          | NF        | 6                |
| CoFeZr oxides <sup>a</sup>         | 104              | 248              | 1.63                                          | NF        | 7                |
| Co-Cu-W oxide <sup>b</sup>         | 103              | 313              | 1.80                                          | CF        | 8                |
| SNCF-NRs <sup>a</sup>              | 232              | 370              | 1.68                                          | GCE       | 9                |
| CuCoO-NWs <sup>a</sup>             | 140              | 270 <sup>d</sup> | 1.61                                          | NF        | 10               |
| CoMnO <sup>a</sup>                 | 45               | 200              | 1.50                                          | NF        | 11               |
| Ni-NiO/N-rGO                       | 153 <sup>a</sup> | 240 <sup>b</sup> | -                                             | GCE       | 12               |
| CoO <sub>x</sub> @CN <sup>a</sup>  | 235              | 260              | 1.38                                          | GCE       | 13               |
| MoO <sub>3</sub> /Ni-NiO           | 62               | 347 <sup>e</sup> | 1.55                                          | CC        | 14               |
| CoMoO@Co/GF                        | 182              | 269              | 1.60                                          | GF        | 15               |
| P-CMO/NF-400                       | 44               | 243              | 1.54                                          | NF        | 16               |
| CMO/NF                             | 171              | 293              | -                                             | NF        | 16               |

Note: The  $\eta_{10}$  was overpotential (mV) at a current density of 10 mA cm<sup>-2</sup>; CFP: carbon fiber paper; CF: copper foam; GCE: glassy carbon electrode; NF: nickel foam; CC: carbon cloth; GF: 3D graphite felt. <sup>a-b</sup> The HER performance of catalysts is measured in 1.0 and 0.1M KOH solution; <sup>c-e</sup> The overpotential at 20, 25 and 100 mA cm<sup>-2</sup>.

**Table S5** XPS peak positions and percent peak areas of fitted high-resolution spectra of Co 2p, Mo 3d, O 1s and S 2p for CoMoO and S-CoMoO-12.4.

| Catalyst     | Co 2p <sub>3/2</sub>      |          | Mo 3d <sub>5/2</sub>      |          | O 1s                      |          | S 2p                                  |          | Co <sup>3+</sup> /Co <sup>2+</sup> | Mo <sup>4+</sup> /Mo <sup>6+</sup> | O <sub>v</sub> /O <sub>lat</sub> |
|--------------|---------------------------|----------|---------------------------|----------|---------------------------|----------|---------------------------------------|----------|------------------------------------|------------------------------------|----------------------------------|
|              | BE (eV)                   | Area (%) | BE (eV)                   | Area (%) | BE (eV)                   | Area (%) | BE (eV)                               | Area (%) |                                    |                                    |                                  |
| CoMoO        | 781.8 (Co <sup>2+</sup> ) | 34.63    |                           |          | 532.4 (H <sub>2</sub> O)  | 12.42    |                                       |          |                                    |                                    |                                  |
|              | 786.4 (sat.)              | 65.37    | 233.0 (Mo <sup>6+</sup> ) | 100      | 531.7 (O <sub>v</sub> )   | 38.62    | -                                     | -        | 0                                  | 0                                  | 0.79                             |
|              |                           |          |                           |          | 530.9 (O <sub>lat</sub> ) | 48.96    |                                       |          |                                    |                                    |                                  |
| After HER    | 781.8 (Co <sup>2+</sup> ) | 22.45    |                           |          | 532.4 (H <sub>2</sub> O)  | 19.73    |                                       |          |                                    |                                    |                                  |
|              | 786.4 (sat.)              | 77.55    | 233.0 (Mo <sup>6+</sup> ) | 100      | 531.7 (O <sub>v</sub> )   | 34.58    | --                                    | -        | 0                                  | 0                                  | 0.75                             |
|              |                           |          |                           |          | 530.9 (O <sub>lat</sub> ) | 45.99    |                                       |          |                                    |                                    |                                  |
| After OER    | 781.8 (Co <sup>2+</sup> ) | 26.04    |                           |          | 532.4 (H <sub>2</sub> O)  | 28.86    |                                       |          |                                    |                                    |                                  |
|              | 780.4 (CoOOH)             | 17.12    | 233.0 (Mo <sup>6+</sup> ) | 100      | 531.7 (O <sub>v</sub> )   | 26.47    | -                                     | -        | 0.66 (CoOOH/Co <sup>2+</sup> )     | 0                                  | 0.59                             |
|              | 786.4 (sat.)              | 56.84    |                           |          | 530.9 (O <sub>lat</sub> ) | 44.67    |                                       |          |                                    |                                    |                                  |
| S-CoMoO-12.4 | 781.8 (Co <sup>2+</sup> ) | 30.41    | 233.0 (Mo <sup>6+</sup> ) | 50.27    | 532.4 (H <sub>2</sub> O)  | 24.36    | 168.9 (S-O)                           | 43.89    |                                    |                                    |                                  |
|              | 779.5 (Co <sup>3+</sup> ) | 15.08    | 228.3 (Mo <sup>4+</sup> ) | 49.73    | 531.7 (O <sub>v</sub> )   | 40.25    | 163.2 (S <sub>n</sub> <sup>2-</sup> ) | 56.11    | 0.50                               | 0.99                               | 1.14                             |
|              | 786.4 (sat.)              | 54.51    |                           |          | 530.9 (O <sub>lat</sub> ) | 35.39    |                                       |          |                                    |                                    |                                  |
| After HER    | 781.8 (Co <sup>2+</sup> ) | 36.99    | 233.0 (Mo <sup>6+</sup> ) | 37.25    | 532.4 (H <sub>2</sub> O)  | 25.77    | 168.8 (S-O)                           | 52.29    |                                    |                                    |                                  |
|              | 786.4 (sat.)              | 63.01    | 228.3 (Mo <sup>4+</sup> ) | 62.75    | 531.7 (O <sub>v</sub> )   | 43.62    | 163.2 (S <sub>n</sub> <sup>2-</sup> ) | 47.71    | 0                                  | 1.68                               | 1.43                             |
|              | 779.5 (Co <sup>3+</sup> ) | -        |                           |          | 530.9 (O <sub>lat</sub> ) | 30.61    |                                       |          |                                    |                                    |                                  |
| After OER    | 781.8 (Co <sup>2+</sup> ) | 37.28    | 233.0 (Mo <sup>6+</sup> ) | 78.04    | 532.4 (H <sub>2</sub> O)  | 19.87    | 168.7 (S-O)                           | 83.31    |                                    |                                    |                                  |
|              | 780.4 (CoOOH)             | 45.29    | 228.3 (Mo <sup>4+</sup> ) | 21.96    | 531.7 (O <sub>v</sub> )   | 46.78    | 163.2 (S <sub>n</sub> <sup>2-</sup> ) | 16.69    | 1.21 (CoOOH/Co <sup>2+</sup> )     | 0.28                               | 1.40                             |
|              | 786.4 (sat.)              | 17.43    |                           |          | 530.9 (O <sub>lat</sub> ) | 33.35    |                                       |          |                                    |                                    |                                  |



## References

- 1 K. Elbert, J. Hu, Z. Ma, Y. Zhang, G. Y. Chen, W. An, P. Liu, H. S. Isaacs, R. R. Adzic and J. X. Wang, *ACS Catal.*, 2015, **5**, 6764-6772.
- 2 J. Hu, C. X. Zhang, L. Jiang, H. Lin, Y. M. An, D. Zhou, M. K. H. Leung and S. H. Yang, *Joule*, 2017, **1**, 383-393.
- 3 Z. T. Li, J. Yang, Z. Chen, C. Y. Zheng, L. Q. Wei, Y. C. Yan, H. Hu, M. B. Wu and Z. P. Hu, *Adv. Funct. Mater.*, 2021, **31**, 2008822.
- 4 X. Y. Li, L. P. Xiao, L. Zhou, Q. C. Xu, J. Weng, J. Xu and B. Liu, *Angew. Chem. Int. Ed.*, 2020, **59**, 21106-21113.
- 5 J. Yu, X. H. Wu, D. Q. Guan, Z. W. Hu, S. C. Weng, H. N. Sun, Y. F. Song, R. Ran, W. Zhou, M. Ni and Z. P. Shao, *Chem. Mater.*, 2020, **32**, 4509-4517.
- 6 X. X. Yu, Z. Y. Yu, X. L. Zhang, P. Li, B. Sun, X. C. Gao, K. Yan, H. Liu, Y. Duan, M. R. Gao, G. X. Wang and S. H. Yu, *Nano Energy*, 2020, **71**, 104652.
- 7 L. L. Huang, D. W. Chen, G. Luo, Y. R. Lu, C. Chen, Y. C. Zou, C. L. Dong, Y. F. Li and S. Y. Wang, *Adv. Mater.*, 2019, **31**, 1901439.
- 8 D. D. Gao, R. J. Liu, J. Biskupek, U. Kaiser, Y. F. Song and C. Streb, *Angew. Chem. Int. Ed.*, 2019, **58**, 4644-4648.
- 9 Y. L. Zhu, W. Zhou, Y. J. Zhong, Y. F. Bu, X. Y. Chen, Q. Zhong, M. L. Liu and Z. P. Shao, *Adv. Energy Mater.*, 2017, **7**, 1602122.
- 10 M. Kuang, P. Han, Q. H. Wang, J. Li and G. F. Zheng, *Adv. Funct. Mater.*, 2016, **26**, 8555-8561.
- 11 J. Li, Y. C. Wang, T. Zhou, H. Zhang, X. H. Sun, J. Tang, L. J. Zhang, A. M. Al-Enizi, Z. Q. Yang and G. F. Zheng, *J. Am. Chem. Soc.*, 2015, **137**, 14305-14312.
- 12 X. Liu, W. Liu, M. Ko, M. Park, M. G. Kim, P. Oh, S. Chae, S. Park, A. Casimir, G. Wu and J. Cho, *Adv. Funct. Mater.*, 2015, **25**, 5799-5808.
- 13 H. Y. Jin, J. Wang, D. F. Su, Z. Z. Wei, Z. F. Pang and Y. Wang, *J. Am. Chem. Soc.*, 2015, **137**, 2688-2694.
- 14 X. Li, Y. Wang, J. Wang, Y. Da, J. Zhang, L. Li, C. Zhong, Y. Deng, X. Han and W. Hu, *Adv. Mater.*, 2020, **32**, 2003414.
- 15 L. Lei, Z. Yin, D. L. Huang, Y. S. Chen, S. Chen, M. Cheng, L. Du and Q. H. Liang, *J. Colloid Interf. Sci.*, 2022, **612**, 413-423.
- 16 J. Wang, J. Hu, C. Liang, L. M. Chang, Y. C. Du, X. J. Han, J. M. Sun and P. Xu, *Chem. Eng. J.*, 2022, **446**, 137094.
